# Supplementary material for: Successful implementation of a rater training program for medical students to evaluate simulated pediatric emergencies
Source: GMS J Med Educ. 2023 Jun 15;40(4):Doc47. doi: 10.3205/zma001629 (PMC10407587; doi:10.3205/zma001629)
Supplement: PEC-PVT [file JME-40-47-s-002.pdf]

## Attachment 2: PEC-PVT

Attachment 2 to Mand N, Stibane T, Sitter H, Maier RF, Leonhardt A. *Successful implementation of a rater training program for medical students to evaluate simulated pediatric emergencies*. GMS J Med Educ. 2023;40(4):Doc47. DOI: 10.3025/zma001629

# PEC-PVT

Datum:

Video-Nr:

Untersucher:

| 1                           | Allgemeine Maßnahmen und Evaluation                            | 0 P.                     | 1 Punkt                                                                                                                                 | 2 Punkte                                                                                                                                          | Time                  | W           |
|-----------------------------|----------------------------------------------------------------|--------------------------|-----------------------------------------------------------------------------------------------------------------------------------------|---------------------------------------------------------------------------------------------------------------------------------------------------|-----------------------|-------------|
| 1-1                         | Handschuhe anziehen                                            | <input type="checkbox"/> | <input type="checkbox"/> nicht alle ODER nicht rechtzeitig                                                                              | <input type="checkbox"/> alle Beteiligten UND rechtzeitig                                                                                         | 3 min                 | 2           |
| 1-2                         | Ausrüstung überprüfen                                          | <input type="checkbox"/> | <input type="checkbox"/> unvollständig ODER nicht rechtzeitig                                                                           | <input type="checkbox"/> vollständig UND rechtzeitig                                                                                              |                       | 4           |
| 1-3                         | Monitore anschliessen                                          | <input type="checkbox"/> | <input type="checkbox"/> unvollständig ODER nicht rechtzeitig                                                                           | <input type="checkbox"/> vollständig UND rechtzeitig                                                                                              |                       | 4.5         |
| 1-4                         | Hilfe rufen                                                    | <input type="checkbox"/> | <input type="checkbox"/> nicht rechtzeitig ODER erst nach Empfehlung des Schauspielers                                                  | <input type="checkbox"/> rechtzeitig                                                                                                              |                       | 4.5         |
| 1-5                         | ABC-Evaluation                                                 | <input type="checkbox"/> | <input type="checkbox"/> unvollständig ODER nicht rechtzeitig                                                                           | <input type="checkbox"/> vollständig UND rechtzeitig                                                                                              |                       | 5           |
| 1-6                         | Sauerstoff                                                     | <input type="checkbox"/> | <input type="checkbox"/> nasale Kanüle (nicht 100%)                                                                                     | <input type="checkbox"/> 100% Sauerstoff verabreicht                                                                                              |                       | 5           |
| 1-7                         | Mitteilung der Diagnose an den Rest des Teams                  | <input type="checkbox"/> | <input type="checkbox"/> unspezifisch ODER nicht rechtzeitig                                                                            | <input type="checkbox"/> spezifisch UND rechtzeitig                                                                                               |                       | 5           |
| 2                           | Evaluation und Behandlung NACH Einsetzen Apnoe/Rhythmusstörung | 0 P.                     | 1 Punkt                                                                                                                                 | 2 Punkte                                                                                                                                          | Time                  | W           |
| 2-1                         | Atemwege öffnen/inspizieren/bewerten                           | <input type="checkbox"/> | <input type="checkbox"/> > 30 sec ODER keine Verbalisierung                                                                             | <input type="checkbox"/> < 30 Sek. UND verbalisiert                                                                                               |                       | 5           |
| 2-2                         | Beginn Beutel-Masken-Beatmung                                  | <input type="checkbox"/> | <input type="checkbox"/> > 30 Sek.                                                                                                      | <input type="checkbox"/> < 30 Sek.                                                                                                                |                       | 5           |
| 2-3                         | Überprüfen Effektivität Beutel-Masken-Beatmung                 | <input type="checkbox"/> | <input type="checkbox"/> > 30 sek ODER keine Verbalisierung                                                                             | <input type="checkbox"/> < 30 sek nach Beginn Beatmung UND Verbalisierung UND Optimierung, falls notwendig                                        |                       | 5           |
| 2-4                         | Pulskontrolle                                                  | <input type="checkbox"/> | <input type="checkbox"/> > 30 Sek. ODER nicht verbalisiert                                                                              | <input type="checkbox"/> < 30 Sek. UND verbalisiert                                                                                               |                       | 5           |
| 2-5                         | EKG Rhythmus identifizieren                                    | <input type="checkbox"/> | <input type="checkbox"/> Rhythmus gecheckt ABER nicht verbalisiert                                                                      | <input type="checkbox"/> korrekten Rhythmus verbalisiert                                                                                          |                       | 4.5         |
| 2-6                         | Start CPR                                                      | <input type="checkbox"/> | <input type="checkbox"/> > 30 Sek. nach Eintreten Pulslosigkeit ODER schlechte CPR Technik                                              | <input type="checkbox"/> < 30 Sek. nach Eintreten Pulslosigkeit UND gute CPR Technik                                                              |                       | 5           |
| 2-7                         | Defibrillator vorbereiten                                      | <input type="checkbox"/> | <input type="checkbox"/> > 30 Sek. nach Eintreten Pulslosigkeit                                                                         | <input type="checkbox"/> < 30 Sek. nach Eintreten Pulslosigkeit                                                                                   |                       | 5           |
| 2-8                         | IV/IO Infusion etablieren                                      | <input type="checkbox"/> | <input type="checkbox"/> > 120 Sek. nach Eintreten Pulslosigkeit                                                                        | <input type="checkbox"/> < 120 Sek. nach Eintreten Pulslosigkeit                                                                                  |                       | 4.5         |
| 2-9                         | Defibrillation (erste)                                         | <input type="checkbox"/> | <input type="checkbox"/> > 90 Sek. nach Eintreten Pulslosigkeit ODER inkorrekte Dosis ODER inkorrekt Modus / Ablauf                     | <input type="checkbox"/> < 90 Sek. nach Eintreten Pulslosigkeit UND korrekte Dosis UND korrekter Modus / Ablauf                                   |                       | 5           |
| 2-10                        | CPR (fortführen)                                               | <input type="checkbox"/> | <input type="checkbox"/> > 10 Sek. nach 1. Defibrillation ODER schlechte CPR Technik                                                    | <input type="checkbox"/> < 10 Sek. nach 1. Defibrillation UND gute CPR Technik                                                                    |                       | 5           |
| 2-11                        | Rhythmuskontrolle                                              | <input type="checkbox"/> | <input type="checkbox"/> Rhythmus gecheckt, aber nicht verbalisiert ODER < 100 Sek. bzw. > 120 Sek nach 1. Defibrillation               | <input type="checkbox"/> korrekten Rhythmus verbalisiert UND zwischen 100 und 120 Sek. nach 1. Defibrillation                                     |                       | 5           |
| 2-12                        | Defibrillation (zweite)                                        | <input type="checkbox"/> | <input type="checkbox"/> < 100 Sek. ODER > 120 Sek. nach 1. Defibrillation ODER inkorrekte Dosis ODER inkorrekt Modus / Ablauf          | <input type="checkbox"/> zwischen 100 und 120 Sek. nach 1. Defibrillation ODER nach 10 CPR Zyklen UND korrekte Dosis UND korrekter Modus / Ablauf |                       | 5           |
| 2-13                        | CPR (fortführen)                                               | <input type="checkbox"/> | <input type="checkbox"/> > 10 Sek. nach 2. Defibrillation ODER schlechte CPR Technik                                                    | <input type="checkbox"/> < 10 Sek. nach 2. Defibrillation UND gute CPR Technik                                                                    |                       | 5           |
| 2-14                        | Rhythmuskontrolle                                              | <input type="checkbox"/> | <input type="checkbox"/> Rhythmus gecheckt, aber nicht verbalisiert ODER < 100 Sek. bzw. > 120 Sek nach 2. Defibrillation               | <input type="checkbox"/> korrekten Rhythmus verbalisiert UND zwischen 100 und 120 Sek. nach 2. Defibrillation                                     |                       | 5           |
| 2-15                        | Defibrillation (dritte)                                        | <input type="checkbox"/> | <input type="checkbox"/> < 100 Sek. ODER > 120 Sek. nach 2. Defibrillation ODER inkorrekte Dosis ODER inkorrekt Modus / Ablauf          | <input type="checkbox"/> zwischen 100 und 120 Sek. nach 2. Defibrillation ODER nach 10 CPR Zyklen UND korrekte Dosis UND korrekter Modus / Ablauf |                       | 5           |
| 2-16                        | CPR (fortführen)                                               | <input type="checkbox"/> | <input type="checkbox"/> > 10 Sek. nach der 3. Defibrillation ODER schlechte CPR Technik                                                | <input type="checkbox"/> < 10 Sek. nach 3. Defibrillation UND gute CPR Technik                                                                    |                       | 5           |
| 2-17                        | Rhythmuskontrolle                                              | <input type="checkbox"/> | <input type="checkbox"/> Rhythmus gecheckt, aber nicht verbalisiert ODER <100 Sek. bzw. >120 Sek. nach 3. (bzw. letzter) Defibrillation | <input type="checkbox"/> korrekten Rhythmus (SR) verbalisiert UND zwischen 100 und 120 Sek. nach 3. (bzw. letzter) Defibrillation                 |                       | 5           |
| 2-18                        | Pulskontrolle                                                  | <input type="checkbox"/> | <input type="checkbox"/> Puls gecheckt, aber nicht verbalisiert ODER <100 Sek. bzw. >120 Sek. nach 3. (bzw. letzter) Defibrillation     | <input type="checkbox"/> Puls gecheckt UND verbalisiert UND zwischen 100 und 120 Sek. nach 3. (bzw. letzter) Defibrillation                       |                       | 5           |
| 2-19                        | Adrenalin                                                      | <input type="checkbox"/> | <input type="checkbox"/> Falsche Dosis ODER vor der 3. Defibrillation verabreicht                                                       | <input type="checkbox"/> IV / IO korrekte Dosis verabreicht nach 3. Defibrillation                                                                |                       | 5           |
| 2-20                        | Amiodaron                                                      | <input type="checkbox"/> | <input type="checkbox"/> Falsche Dosis ODER vor der 3. Defibrillation verabreicht                                                       | <input type="checkbox"/> IV / IO korrekte Dosis verabreicht nach 3. Defibrillation                                                                |                       | 4           |
| 2-21                        | Blutdruck ODER Recap Zeit messen                               | <input type="checkbox"/> | <input type="checkbox"/>                                                                                                                | <input type="checkbox"/> nach ROSC                                                                                                                |                       | 3           |
| 3                           | Suche nach reversiblen Ursachen                                | 0 P.                     | 1 Punkt                                                                                                                                 | 2 Punkte                                                                                                                                          |                       | W           |
| 3-1                         | 4Hs & HITS-Evaluation                                          | <input type="checkbox"/> | <input type="checkbox"/> Unvollständig erledigt                                                                                         | <input type="checkbox"/> Komplett durchgeführt und falls nötig Gegenmassnahmen eingeleitet                                                        |                       | 4.5         |
| 3-2                         | Blutentnahme für BGA, Glukose, Elektrolyte                     | <input type="checkbox"/> | <input type="checkbox"/> Erledigt, aber nicht verbalisiert                                                                              | <input type="checkbox"/> durchgeführt UND verbalisiert                                                                                            |                       | 3.5         |
| 3-3                         | Frühzeitig weitere Behandlung anbahnen                         | <input type="checkbox"/> | <input type="checkbox"/>                                                                                                                | <input type="checkbox"/> erledigt                                                                                                                 |                       | 3           |
| Zeit bis 1. Defibrillation: |                                                                | sec                      | Zeit bis CPR:                                                                                                                           | sec                                                                                                                                               | Zeit bis MB-Beatmung: | sec         |
| Dosis 1./2./3. Def.:        |                                                                | J                        | Dosis Adrenalin:                                                                                                                        | µg                                                                                                                                                | Dosis Amiodaron:      | mg          |
|                             |                                                                |                          |                                                                                                                                         |                                                                                                                                                   |                       | Gewicht: kg |
